# Supplementary material for: To culture or not to culture: a snapshot of culture-dependent and culture-independent bacterial diversity from peanut rhizosphere
Source: PeerJ journal article supplement (doi:10.7717/peerj.12035), 2021-09-01

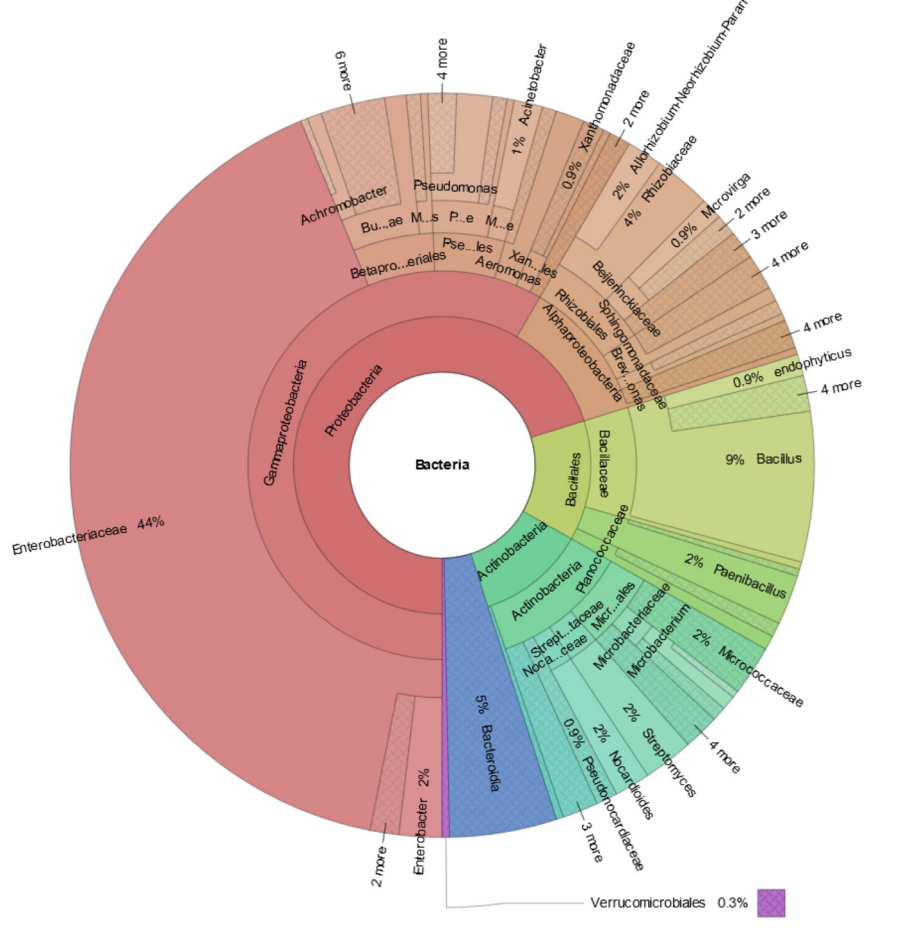

Supplement: FigureS4.pdf [file FigureS4.pdf]
